# Supplementary figures and images for: Physical observables to determine the nature of membrane-less cellular sub-compartments
Source: eLife journal article supplement (doi:10.7554/elife.69181), 2021-10-22

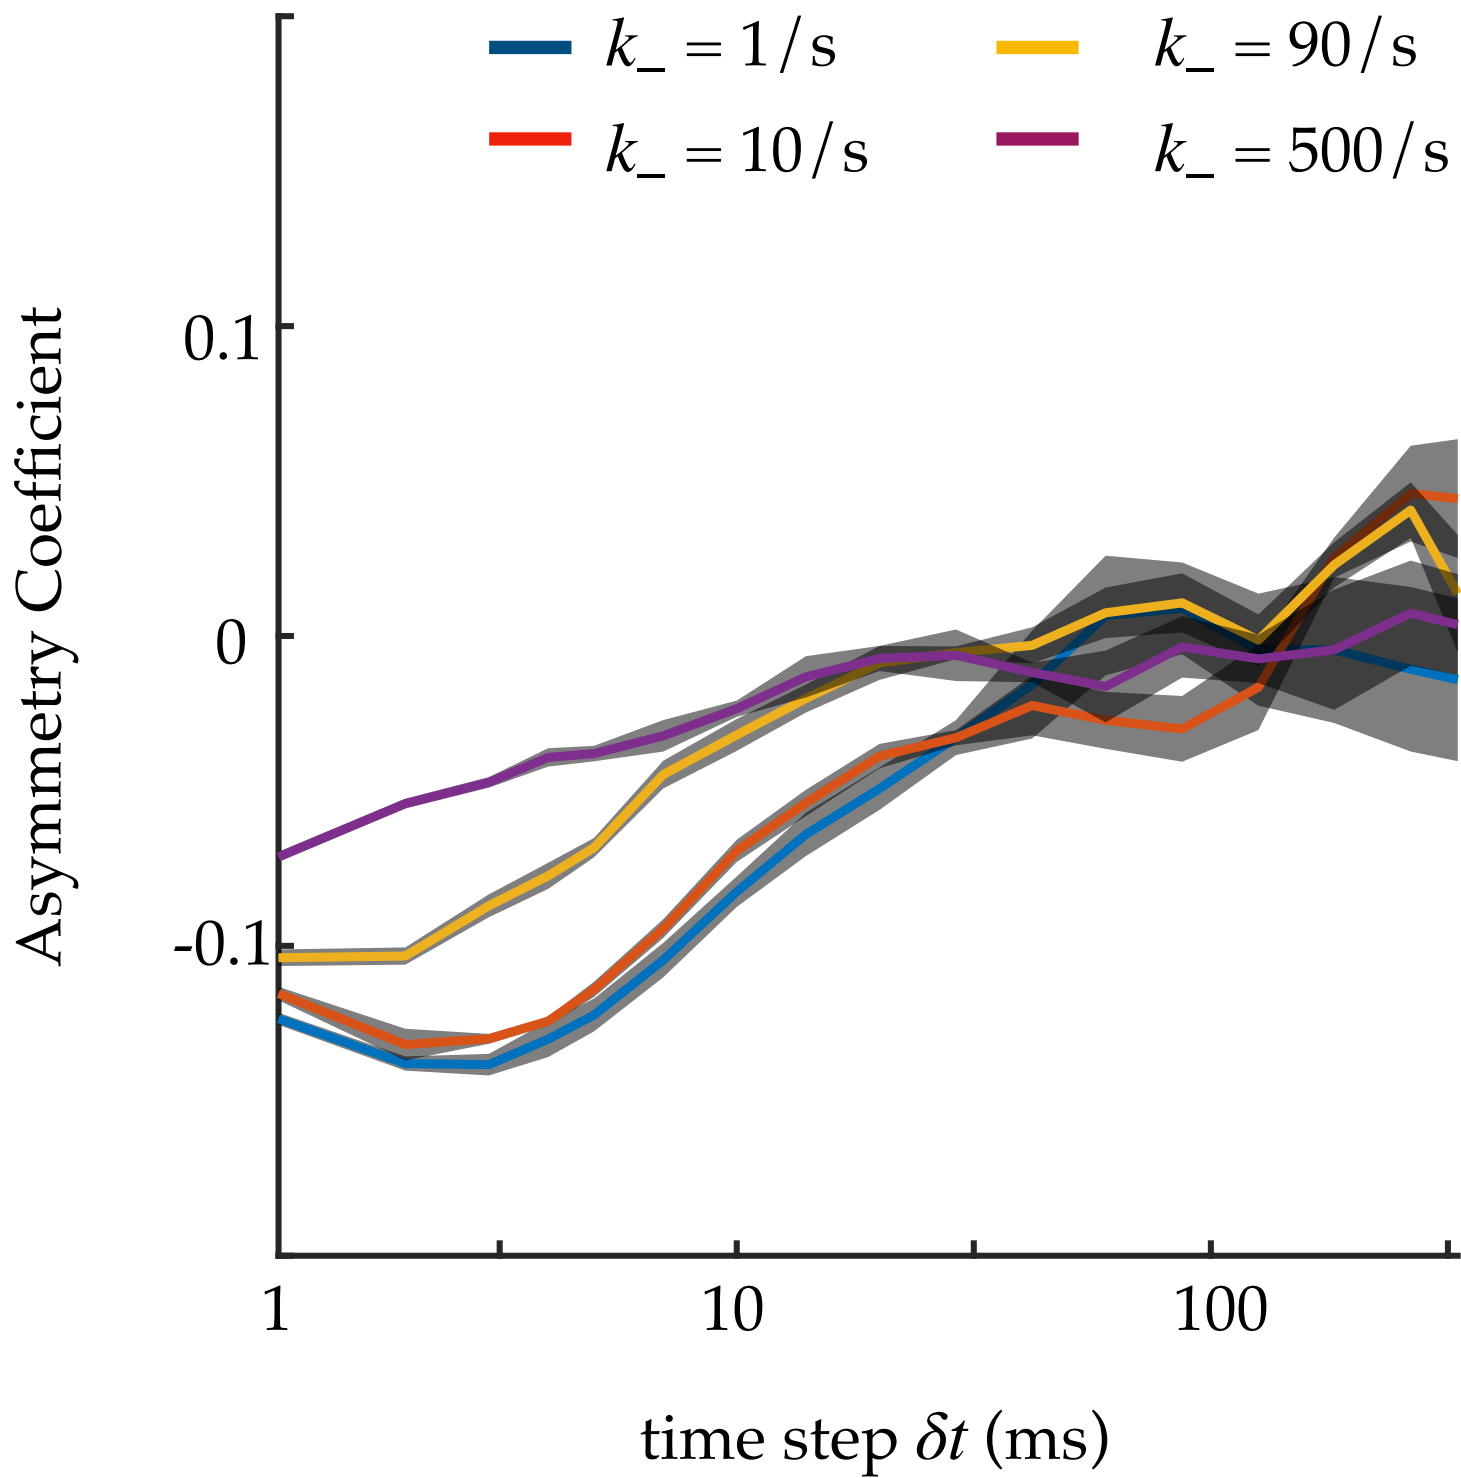

Supplement: supp [file elife-69181-supp-v1.zip]
